# Supplementary material for: Molecules Present in Plant Essential Oils for Prevention and Treatment of Colorectal Cancer (CRC)
Source: MDPI journal article supplement (doi:10.3390/molecules26040885), 2021-02-08
Supplement: s1 [file s1]

## Supplementary materials

**Table S1: IC<sub>50</sub> and Selectivity Index in NCM460, Caco2 and SW620 cells.** IC<sub>50</sub> expressed in  $\mu\text{M}$  was calculated by using GraphPad Prism and the value is reported in the upper part of the Table. Selectivity Index was calculated by dividing the IC<sub>50</sub> of normal cells (NCM460) for IC<sub>50</sub> of each neoplastic cell line (Caco2 and SW620). A value > 1 is considered representative of a selective action of the compound in neoplastic versus normal cells.

|               | IC <sub>50</sub> $\mu\text{M}$ |       |         |       |
|---------------|--------------------------------|-------|---------|-------|
|               | Cinnamaldehyde                 |       | Eugenol |       |
|               | 24 h                           | 72 h  | 24 h    | 72 h  |
| <b>NCM460</b> | 218.3                          | 83.25 | 1371    | 1161  |
| <b>Caco2</b>  | 166.1                          | 86.85 | 485.3   | 729.5 |
| <b>SW620</b>  | 91.99                          | 92.11 | 918.1   | 866.4 |

  

|              | Selectivity Index |      |         |      |
|--------------|-------------------|------|---------|------|
|              | Cinnamaldehyde    |      | Eugenol |      |
|              | 24 h              | 72 h | 24 h    | 72 h |
| <b>Caco2</b> | 1.31              | 0.96 | 2.82    | 1.6  |
| <b>SW620</b> | 2.37              | 0.9  | 1.49    | 1.34 |

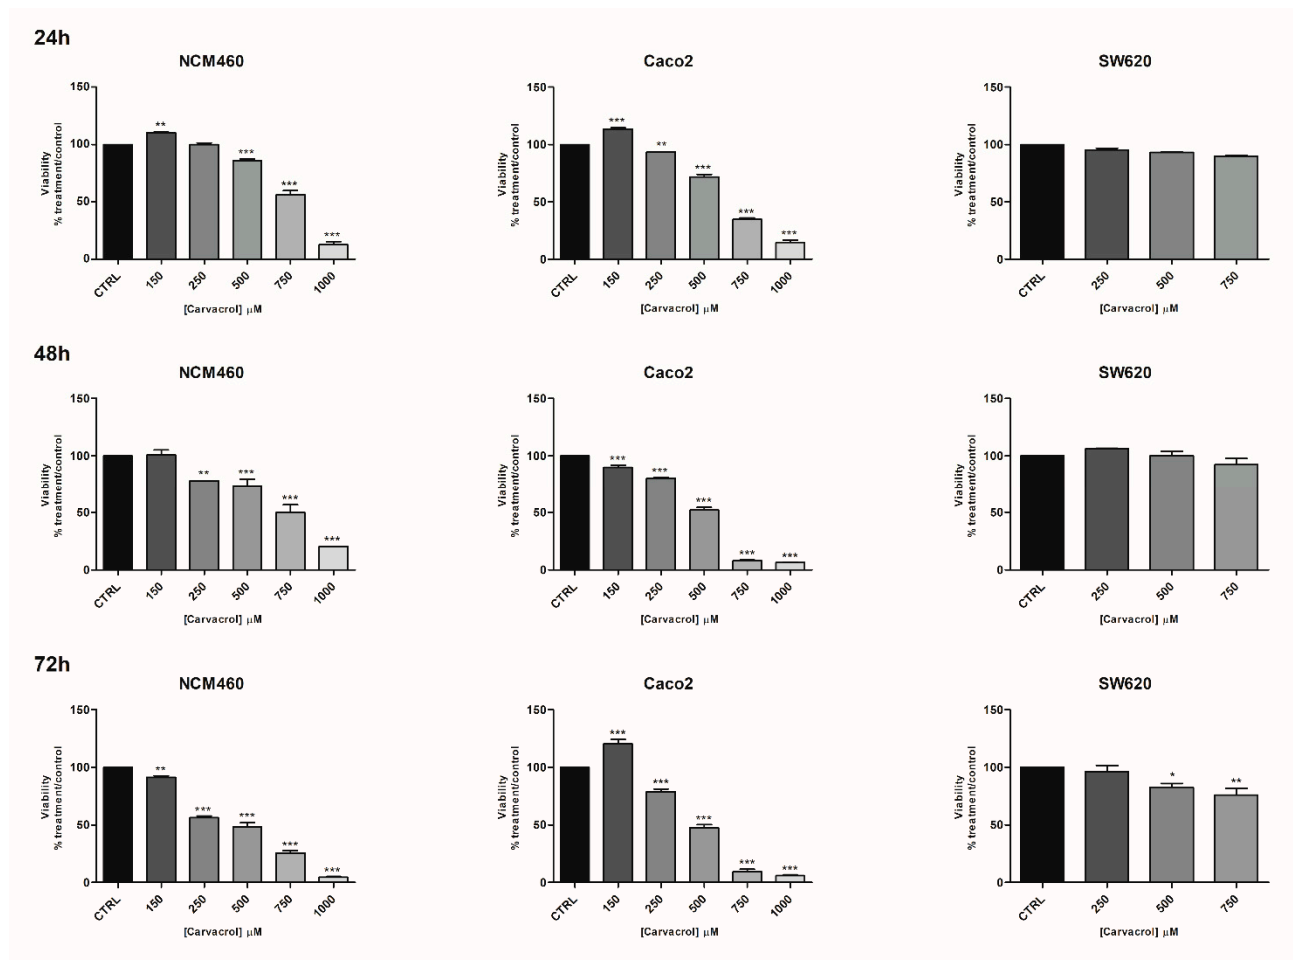

**FigureS1.** Effects of carvacrol on the viability of NCM460, Caco2 and SW620 cell lines at three time points: 24, 48, 72 hours. The columns show the average median  $\pm$  SE of three replicate experiments with three samples analysed per replicate. Significant statistical differences were evaluated with one-way ANOVA, followed by Bonferroni's Multiple Comparison test was applied to compare the treatment and the control groups: \*= $p < 0.05$ ; \*\*= $p < 0.01$ ; \*\*\*= $p < 0.001$ . NCM460: human normal colon mucosal epithelial cells; Caco2: human epithelial colorectal adenocarcinoma cells; SW620: colon cancer cells derived from lymph node metastatic site.

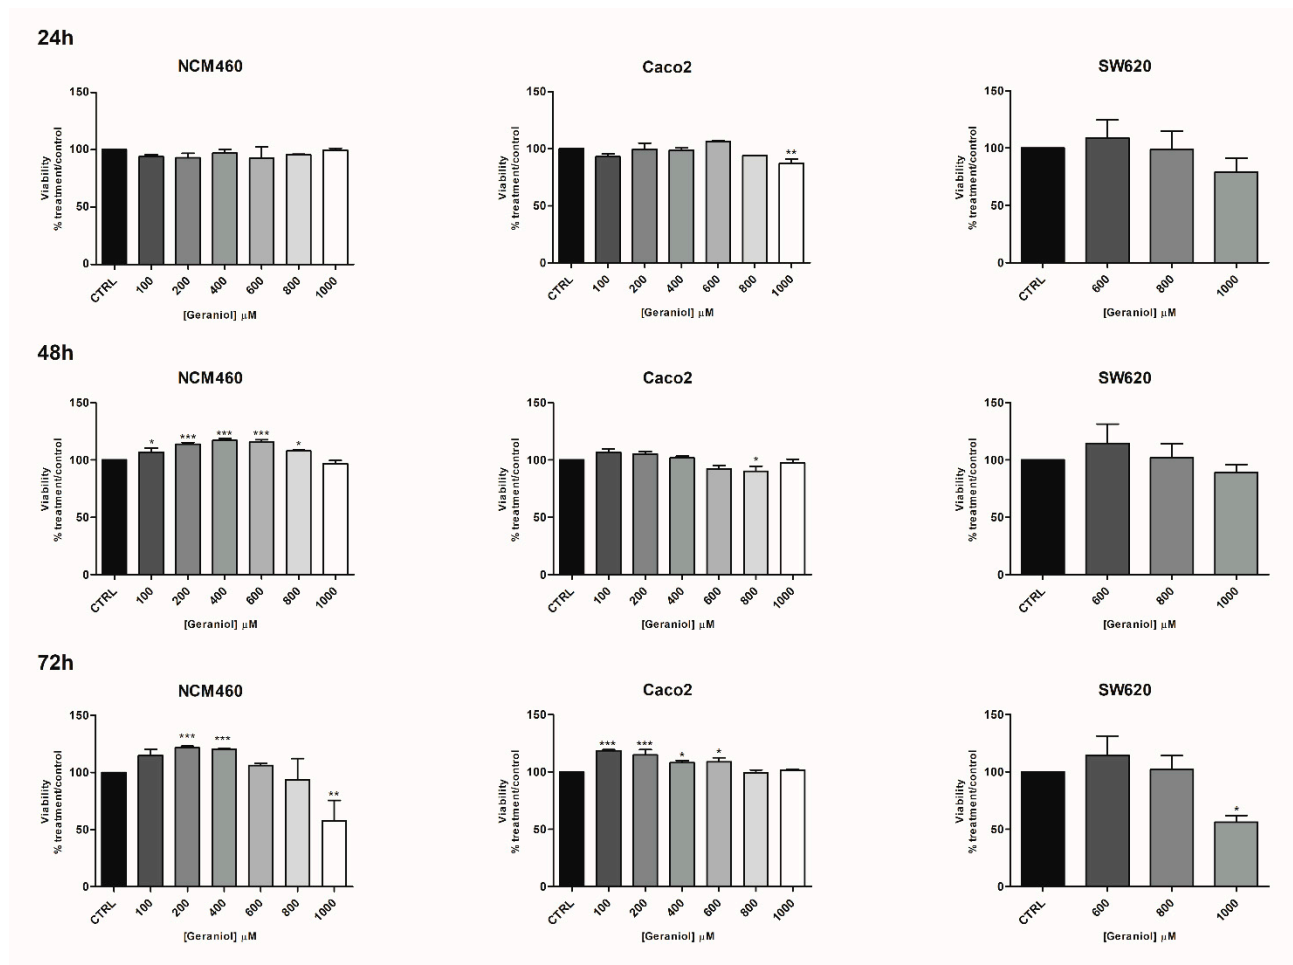

**Figure S2.** Effects of geraniol on the viability of NCM460, Caco2 and SW620 cell lines at three time points: 24, 48, 72 hours. The columns show the average median  $\pm$  SE of three replicate experiments with three samples analysed per replicate. Significant statistical differences were evaluated with one-way ANOVA, followed by Bonferroni's Multiple Comparison test was applied to compare the treatment and the control groups: \*= $p < 0.05$ ; \*\*= $p < 0.01$ ; \*\*\*= $p < 0.001$ . NCM460: human normal colon mucosal epithelial cells; Caco2: human epithelial colorectal adenocarcinoma cells; SW620: colon cancer cells derived from lymph node metastatic site.

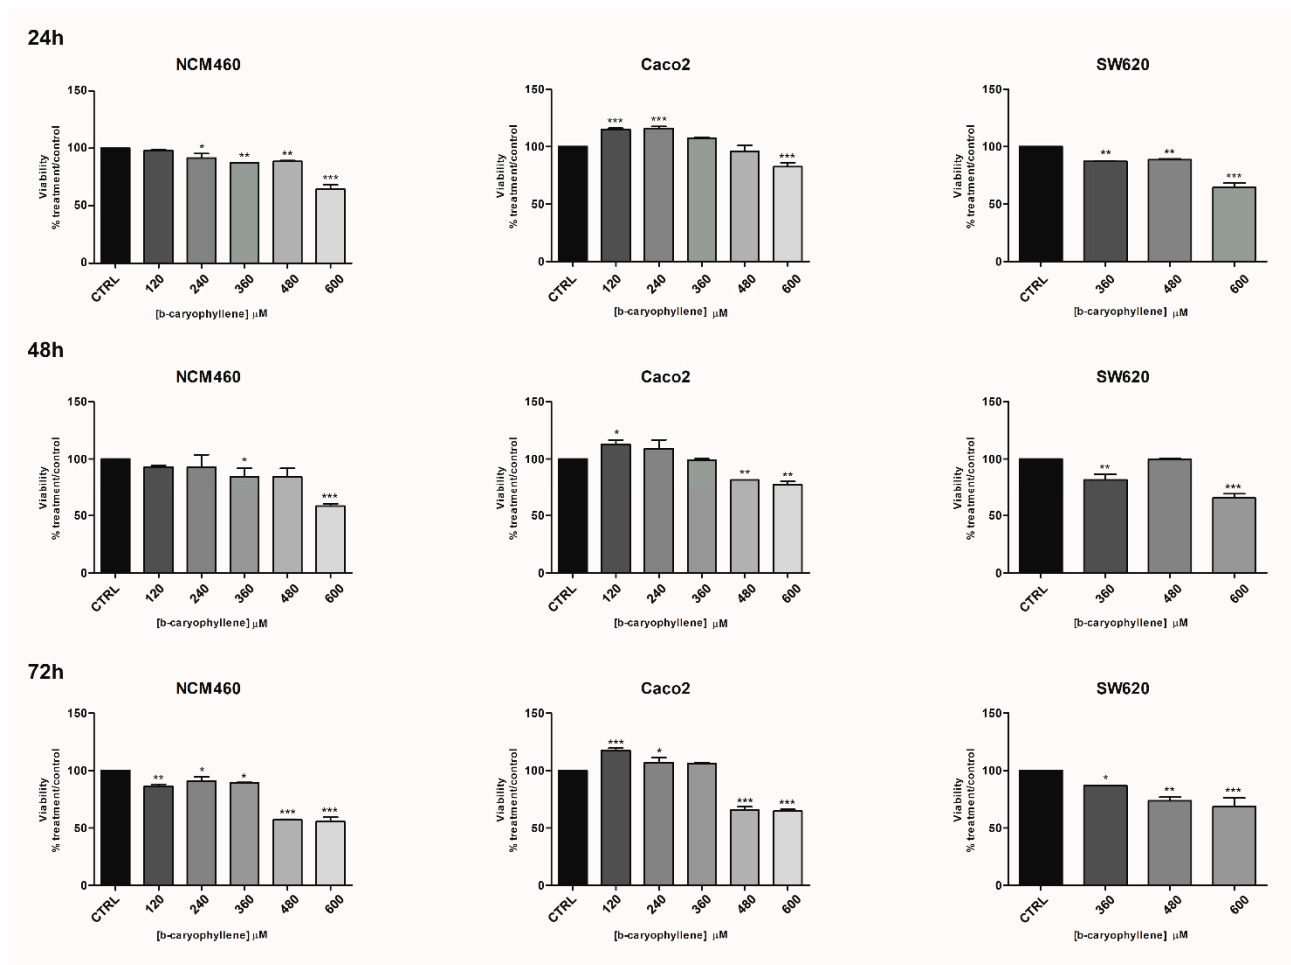

**Figure S3.** Effects of  $\beta$ -caryophyllene on the viability of NCM460, Caco2 and SW620 cell lines at three time points: 24, 48, 72 hours. The columns show the average median  $\pm$  SE of three replicate experiments with three samples analysed per replicate. Significant statistical differences were evaluated with one-way ANOVA, followed by Bonferroni's Multiple Comparison test was applied to compare the treatment and the control groups: \*= $p < 0.05$ ; \*\*= $p < 0.01$ ; \*\*\*= $p < 0.001$ . NCM460: human normal colon mucosal epithelial cells; Caco2: human epithelial colorectal adenocarcinoma cells; SW620: colon cancer cells derived from lymph node metastatic site.

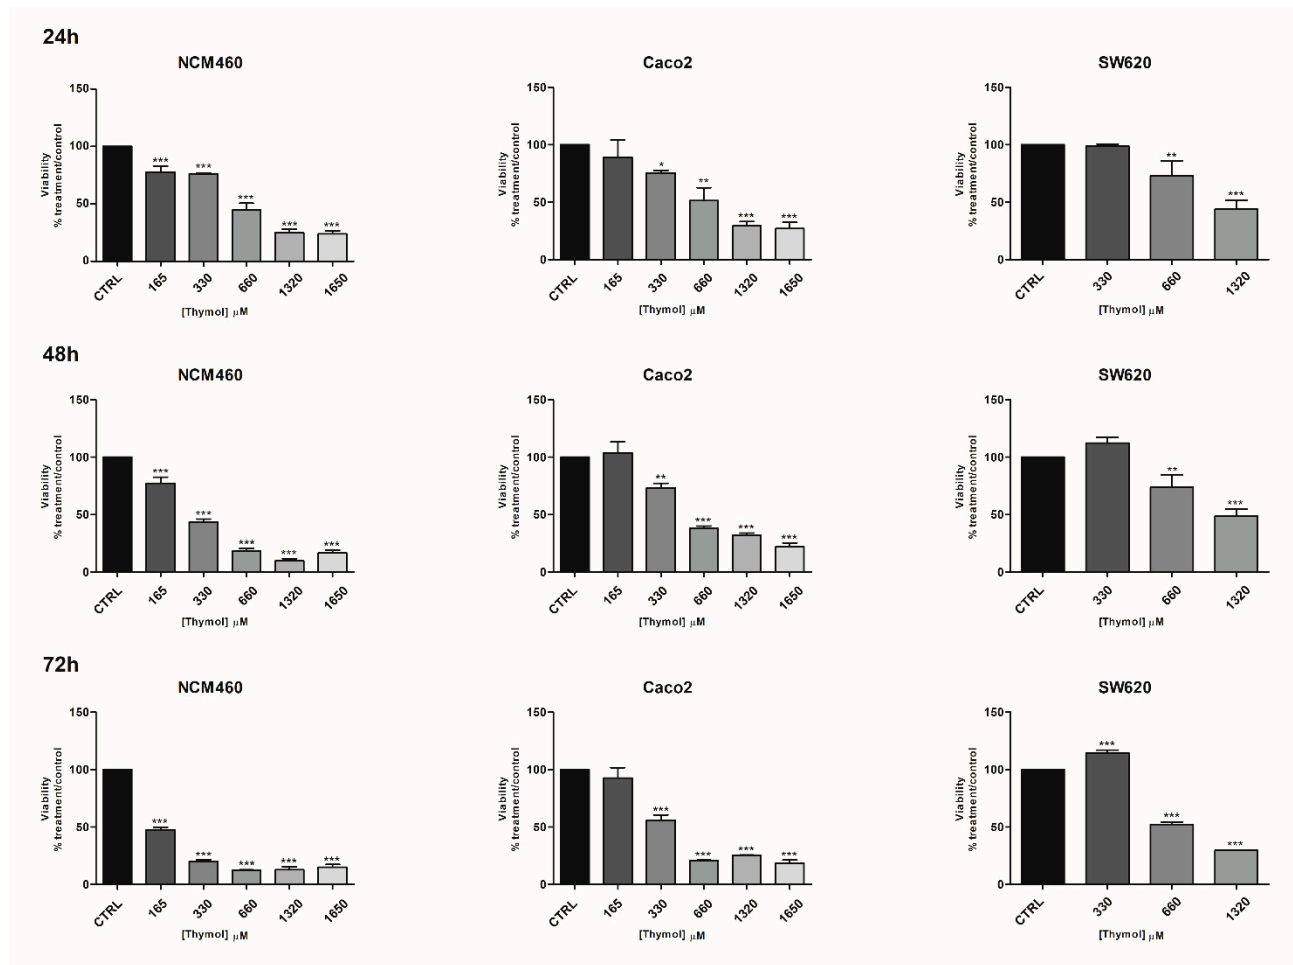

**Figure S4.** Effects of thymol on the viability of NCM460, Caco2 and SW620 cell lines at three time points: 24, 48, 72 hours. The columns show the average median  $\pm$  SE of three replicate experiments with three samples analysed per replicate. Significant statistical differences were evaluated with one-way ANOVA, followed by Bonferroni's Multiple Comparison test was applied to compare the treatment and the control groups: \*= $p < 0.05$ ; \*\*= $p < 0.01$ ; \*\*\*= $p < 0.001$ . NCM460: human normal colon mucosal epithelial cells; Caco2: human epithelial colorectal adenocarcinoma cells; SW620: colon cancer cells derived from lymph node metastatic site.

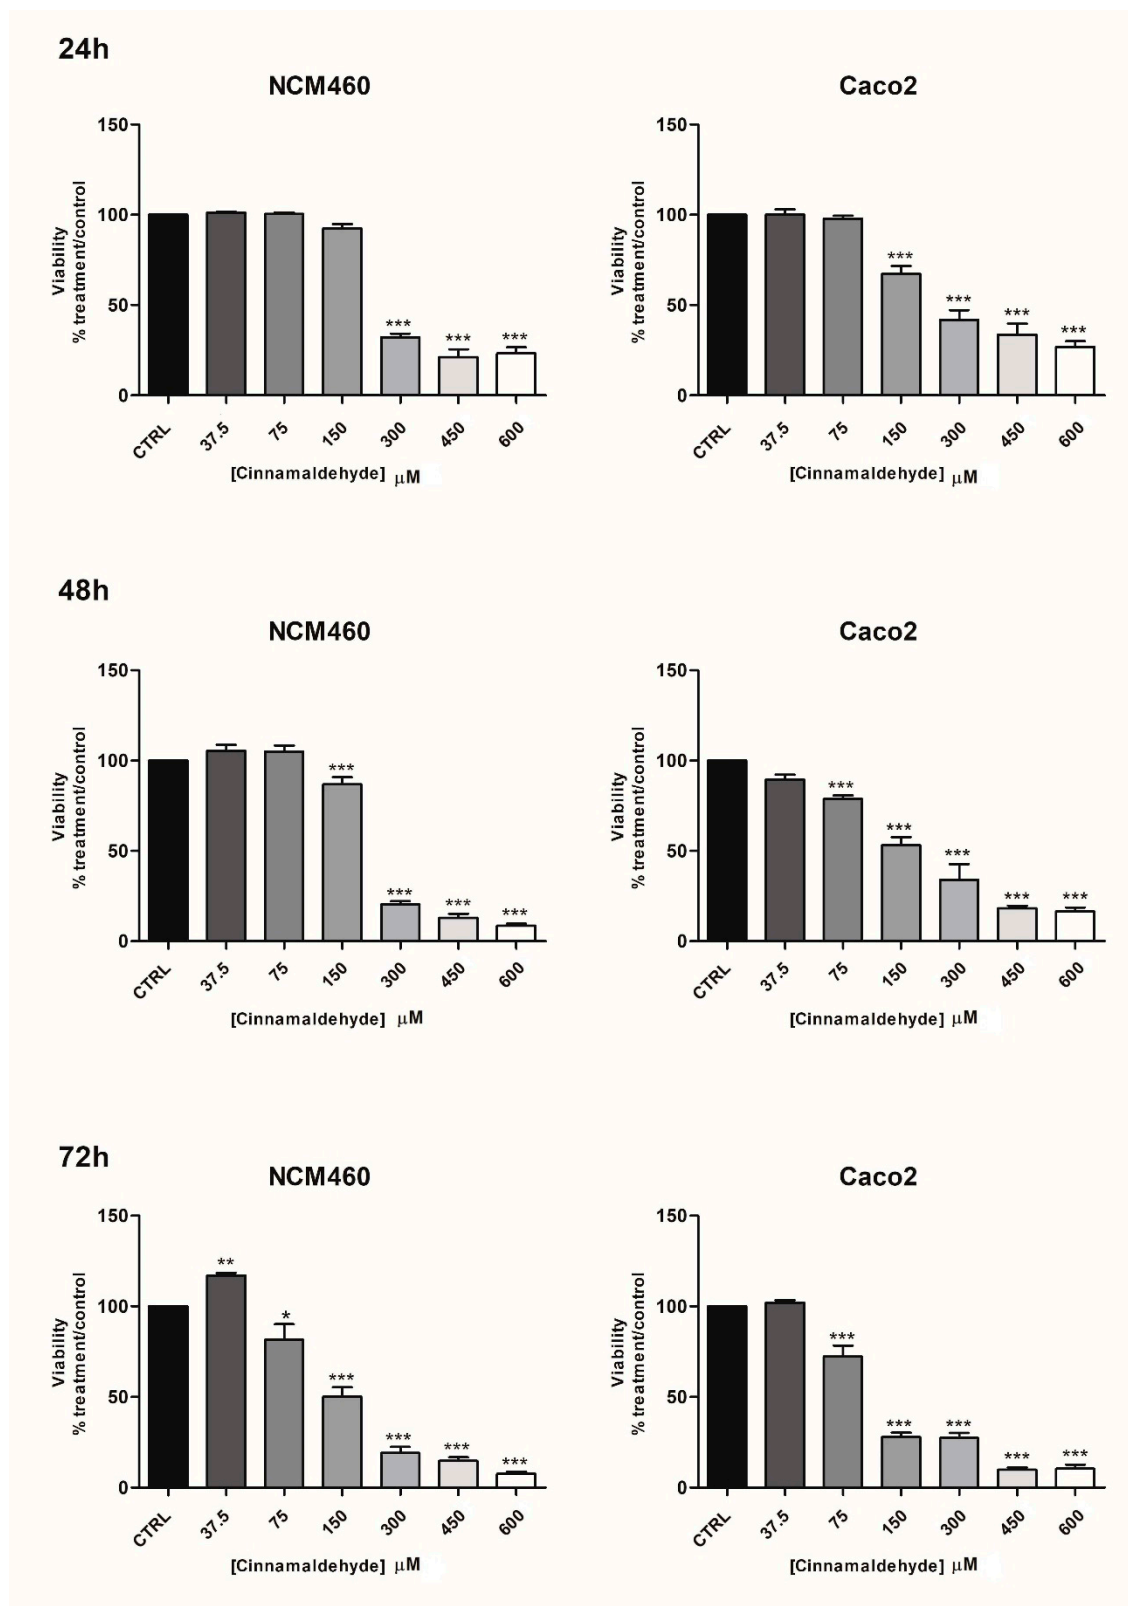

**Figure S5.** Effects of cinnamaldehyde on the viability of NCM460 and Caco2 cell lines at three time points: 24, 48, 72 hours. The columns show the average median  $\pm$  SE of three replicate experiments with three samples analysed per replicate. Significant statistical differences were evaluated with one-way ANOVA, followed by Bonferroni's Multiple Comparison test was applied to compare the treatment and the control groups: \*= $p<0.05$ ; \*\*= $p<0.01$ ; \*\*\*= $p<0.001$ . NCM460: human normal colon mucosal epithelial cells; Caco2: human epithelial colorectal adenocarcinoma cells.

24h

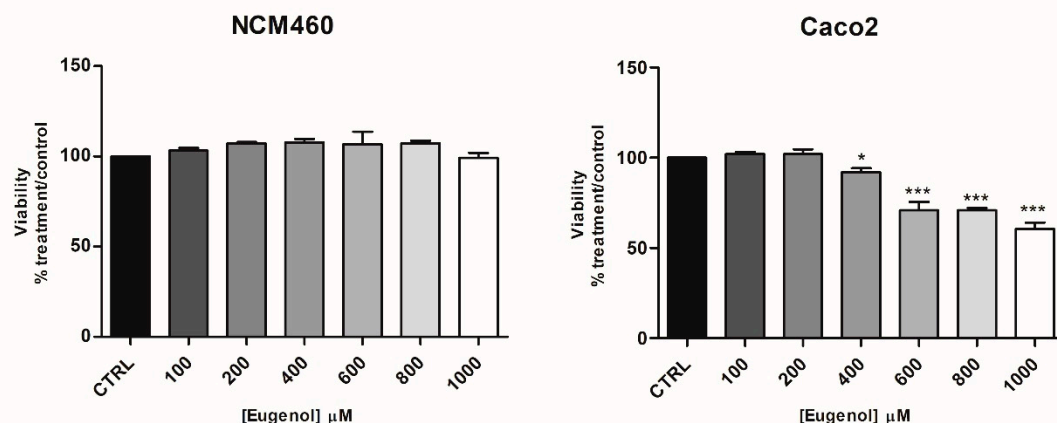

48h

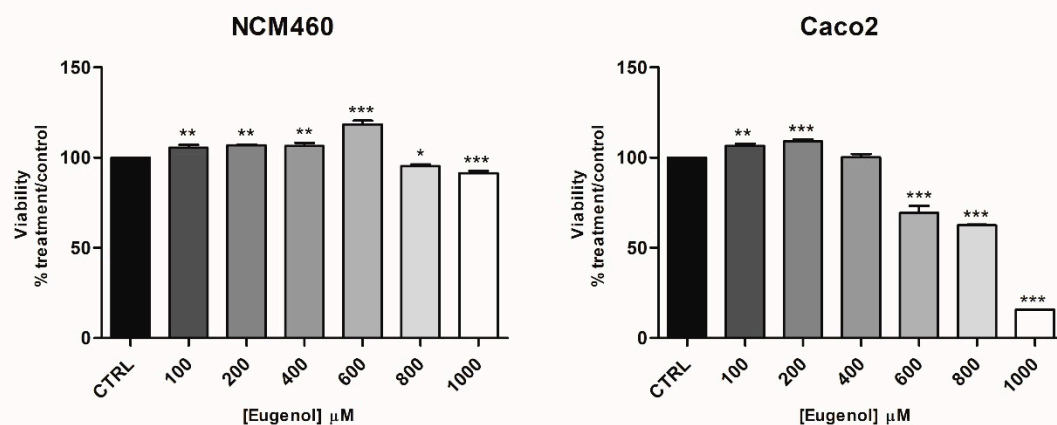

72h

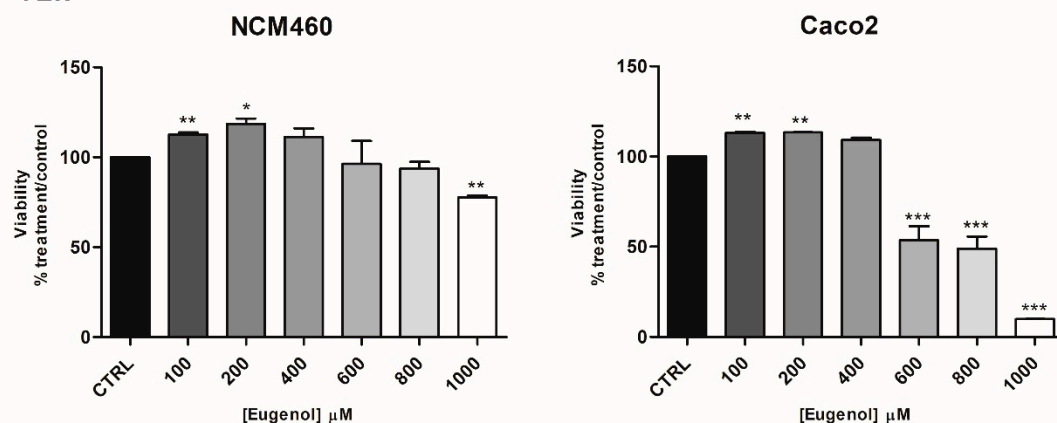

**Figure S6.** Effects of eugenol on the viability of NCM460 and Caco2 cell lines at three time points: 24, 48, 72 hours. The columns show the average median  $\pm$  SE of three replicate experiments with three samples analysed per replicate. Significant statistical differences were evaluated with one-way ANOVA, followed by Bonferroni's Multiple Comparison test was applied to compare the treatment and the control groups: \*= $p < 0.05$ ; \*\*= $p < 0.01$ ; \*\*\*= $p < 0.001$ . NCM460: human normal colon mucosal epithelial cells; Caco2: human epithelial colorectal adenocarcinoma cells.
